# Supplementary material
Source: publisher site journal article supplement (https://zookeys.pensoft.net/article/6226/download/suppl/35/)

methodological control:  
wing landmarks *C. rosa*

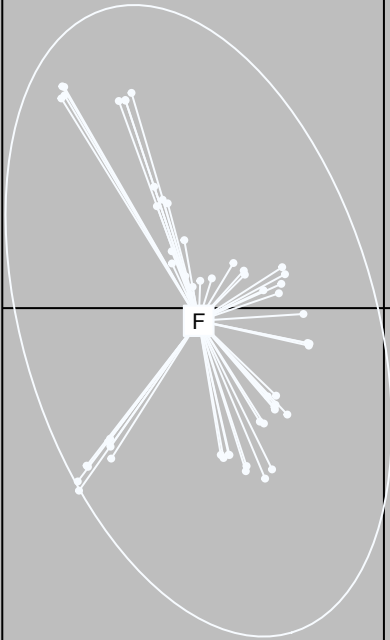

sex

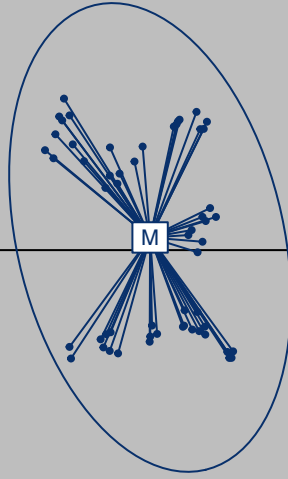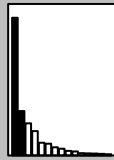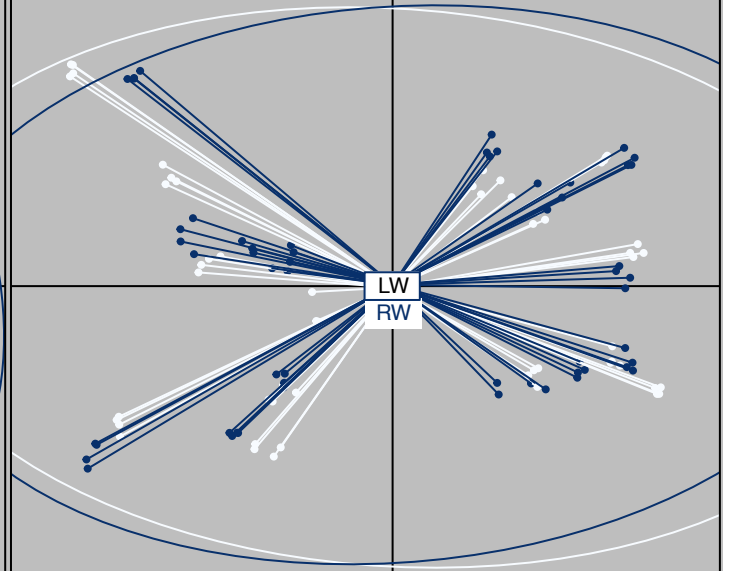

wing

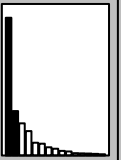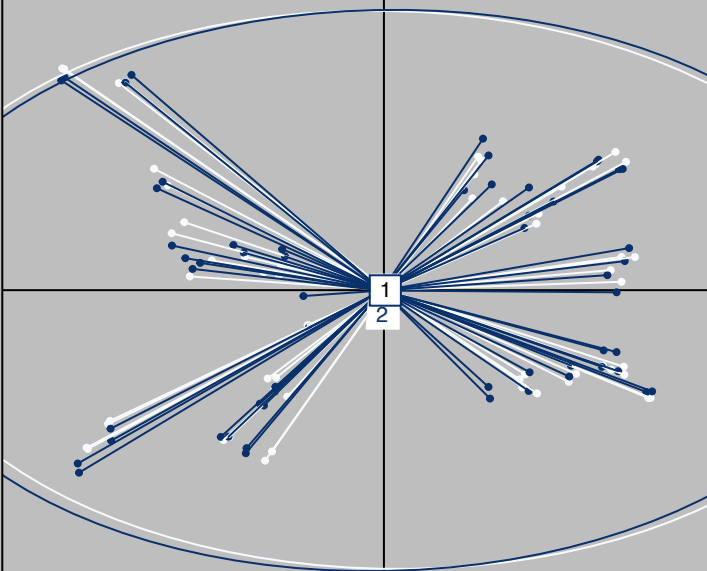

image

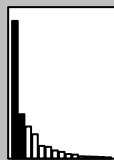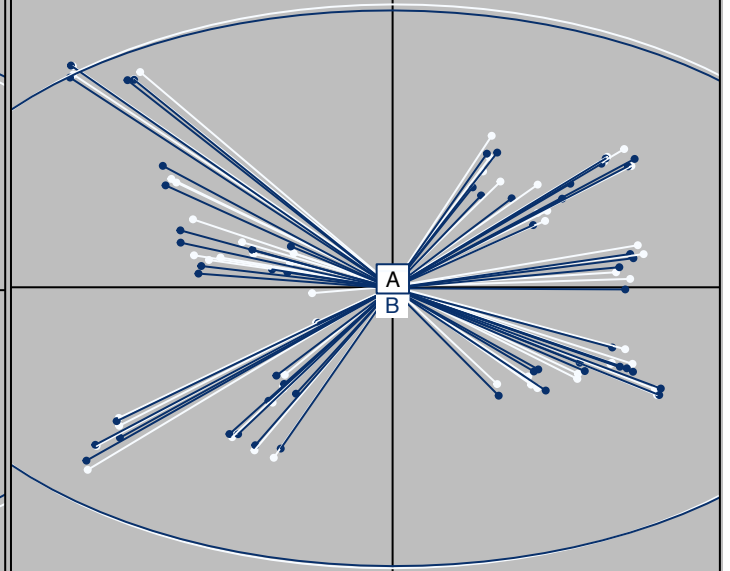

measure

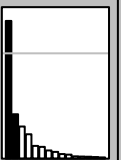

Supplement: Supplementary file
